# Supplementary material for: Bioactive Polyphenolic Compounds Showing Strong Antiviral Activities against Severe Acute Respiratory Syndrome Coronavirus 2
Source: MDPI journal article supplement (doi:10.3390/pathogens10060758), 2021-06-15
Supplement: s1 [file s1]

## Supplementary data

| No. | R    | 2 D binding interactions |
|-----|------|--------------------------|
| 1   | S    |                          |
|     | Mpro |                          |
| 2   | S    |                          |

|   |      |                                                                                      |
|---|------|--------------------------------------------------------------------------------------|
|   | Mpro | 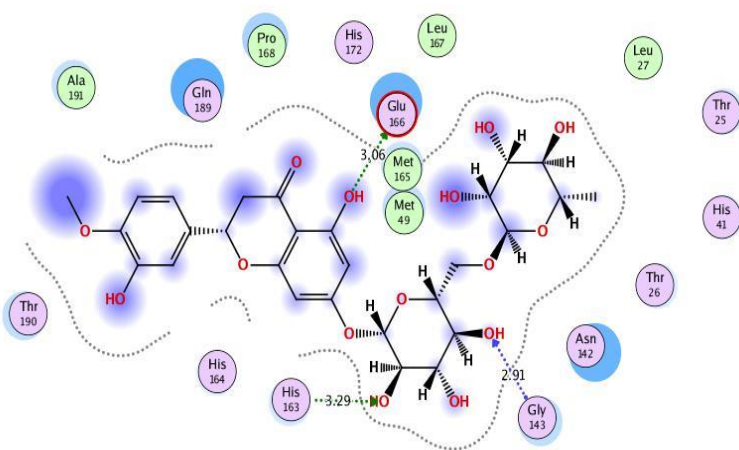   |
| 3 | S    |   |
|   | Mpro |  |



| Tested comp.                   | R    | 3 D interactions | 3 D positioning |
|--------------------------------|------|------------------|-----------------|
| Hydroxychloro-<br>quine<br>(4) | S    |                  |                 |
|                                | Mpro |                  |                 |

**Figure S2.** 3D receptor binding pictures showing the interactions and positioning of hydroxychloroquine (4) inside the S and Mpro pockets of SARS-CoV-2. Red dash represents H-bonds and black dash represents H-pi interactions.
